# Supplementary material
Source: MDPI journal article supplement (https://www.mdpi.com/2073-4352/7/5/145)
Supplement: s1 [file s1]

# Polymorphism and Structural Distortions of Ternary Mixed-Metal Oxide Photocatalysts Constructed with $\alpha$ - $\text{U}_3\text{O}_8$ Types of Layers

Nacole King<sup>1\*</sup>, Jonathan Boltersdorf<sup>2</sup>, Paul Maggard<sup>3</sup>, Winnie Wong-Ng<sup>1</sup>

**Table S1.** A table of selected members comprised of single pentagonal bipyramid layers alternating with octahedral layers. The space group, unit cell parameters, and interatomic distances are listed for symmetry unique  $\text{MO}_7$  pentagonal bipyramids ( $\text{M} = \text{Nb}, \text{Ta}$ ) are included.

| Layer       | Chemical Formula                      | Space Group | $a$ (Å)    | $b$ (Å)    | $c$ (Å)    | Interatomic distances (Å)                                                                                                                                                                                                                                                             | Ref. |
|-------------|---------------------------------------|-------------|------------|------------|------------|---------------------------------------------------------------------------------------------------------------------------------------------------------------------------------------------------------------------------------------------------------------------------------------|------|
| n=1, single | $\text{Ag}_2\text{Nb}_4\text{O}_{11}$ | $R\bar{3}c$ | 6.2301(1)  | 6.2301(1)  | 37.0163(7) | NbO <sub>7</sub> : Nb-O 1.9730(11) x2<br>Nb-O 2.0032(10) x2<br>Nb-O 2.0216(21) x2<br>Nb-O 2.4207(21)                                                                                                                                                                                  | [43] |
|             |                                       | $R3C$       | 6.2080(1)  | 6.2080(1)  | 37.0135(7) | NbO <sub>7</sub> : Nb-O 1.945(7)<br>Nb-O 1.981(6)<br>Nb-O 2.001(8)<br>Nb-O 2.010(7)<br>Nb-O 2.013(9)<br>Nb-O 2.043(6)<br>Nb-O 2.391(2)                                                                                                                                                | [43] |
|             |                                       | $R3$        | 6.20524(9) | 6.20524(9) | 37.0175(6) | NbO <sub>7</sub> : Nb1-O 1.878(15)<br>Nb1-O 2.006(9)<br>Nb1-O 2.024(15)<br>Nb1-O 2.026(15)<br>Nb1-O 2.039(10)<br>Nb1-O 2.064(16)<br>Nb1-O 2.304(9)<br>Nb2-O 1.904(16)<br>Nb2-O 1.982(9)<br>Nb2-O 1.984(16)<br>Nb2-O 1.998(15)<br>Nb2-O 2.036(10)<br>Nb2-O 2.083(14)<br>Nb2-O 2.490(9) | [43] |
|             | $\text{Ag}_2\text{Ta}_4\text{O}_{11}$ | $R\bar{3}c$ | 6.2075(1)  | 6.2075(1)  | 36.8605(6) | TaO <sub>7</sub> : Ta-O 1.9736(10) x2<br>Ta-O 2.0026(9) x2<br>Ta-O 2.0133(5) x2<br>Ta-O 2.3983(18) x2                                                                                                                                                                                 | [43] |
|             |                                       |             |            |            |            |                                                                                                                                                                                                                                                                                       |      |

| Layer                  | Chemical Formula                                | Space Group                | <i>a</i> (Å) | <i>b</i> (Å) | <i>c</i> (Å) | Interatomic distances (Å)                                                                                                                                                                                                                                                                 | Ref. |
|------------------------|-------------------------------------------------|----------------------------|--------------|--------------|--------------|-------------------------------------------------------------------------------------------------------------------------------------------------------------------------------------------------------------------------------------------------------------------------------------------|------|
| <b>n=1,<br/>single</b> | Cu <sub>2</sub> Ta <sub>4</sub> O <sub>11</sub> | <i>R</i> $\bar{3}c$        | 6.2190(2)    | 6.2190(2)    | 37.107(1)    | TaO <sub>7</sub> : Ta-O 1.9972(8)<br>Ta-O 1.9973(8)<br>Ta-O 1.994(2)<br>Ta-O 1.994(3)<br>Ta-O 2.021(2)x2<br>Ta-O 2.44(1)                                                                                                                                                                  | [66] |
|                        |                                                 | <i>Cc</i>                  | 10.734 (1)   | 10.734 (1)   | 10.734 (1)   | TaO <sub>7</sub> : Ta-O 1.92(2) x2<br>Ta-O 1.98(1) x2<br>Ta-O 2.04(1) x2<br>Ta-O 2.46(3)                                                                                                                                                                                                  | [65] |
|                        | K <sub>2</sub> Ta <sub>4</sub> O <sub>11</sub>  | <i>R</i> $\bar{3}c$        | 6.280(3)     | 6.280(3)     | 36.8769(10)  |                                                                                                                                                                                                                                                                                           | [41] |
|                        | Na <sub>2</sub> Nb <sub>4</sub> O <sub>11</sub> | <i>R</i> $\bar{3}c$        | 6.2279(1)    | 6.2279(1)    | 36.7264(7)   | NbO <sub>7</sub> : Nb-O 1.9638(10) x2<br>Nb-O 2.0073(10) x2<br>Nb-O 2.0216(6) x2<br>Nb-O 2.4136(21)                                                                                                                                                                                       | [42] |
|                        |                                                 | <i>C2/c</i>                | 10.84        | 6.162        | 12.75        | NbO <sub>7</sub> : Nb-O 1.96(2)<br>Nb-O 1.96(3)<br>Nb-O 1.99(2)<br>Nb-O 2.01(1)<br>Nb-O 2.02(3)<br>Nb-O 2.04(3)<br>Nb-O 2.38(2)                                                                                                                                                           | [38] |
|                        | Na <sub>2</sub> Ta <sub>4</sub> O <sub>11</sub> | <i>R</i> $\bar{3}c$        | 6.198(3)     | 6.198(3)     | 36.56(2)     | TaO <sub>7</sub> : Ta-O 1.953(14) x2<br>Ta-O 2.009(7) x2<br>Ta-O 2.010(6) x2<br>Ta-O 2.379(23)                                                                                                                                                                                            | [64] |
|                        | PbTa <sub>4</sub> O <sub>11</sub>               | <i>R</i> 3                 | 6.23700 (2)  | 6.23700 (2)  | 36.8613 (1)  | TaO <sub>7</sub> : Ta1-O 1.944(8)<br>Ta1-O 1.971(8)<br>Ta1-O 2.013(7)<br>Ta1-O 2.014(7)<br>Ta1-O 2.032(11)<br>Ta1-O 2.0389(11)<br>Ta1-O 2.379(4)<br>Ta2-O 2.3983(18)<br>Ta2-O 1.9736(10)<br>Ta2-O 2.0026(9)<br>Ta2-O 2.0133(5)<br>Ta2-O 2.3983(18)<br>Ta2-O 1.9736(10)<br>Ta2-O 2.0026(9) | [35] |
|                        | SrTa <sub>4</sub> O <sub>11</sub>               | <i>P</i> 6 <sub>3</sub> 22 | 6.2543(1)    | 6.2543(1)    | 12.3320(3)   | TaO <sub>7</sub> : Ta-O 1.955(1) x2<br>Ta-O 1.980(1) x2<br>Ta-O 2.0598(6) x2<br>Ta-O 2.478(2)                                                                                                                                                                                             | [39] |

**Table S2.** The general trends for extended structure increase in the “A” site coordination number is directly correlated to decreasing c lattice constant parameters, (2) members where  $m = 1$  belong to centrosymmetric nonpolar space groups which contain an inversion center, and (3) members where  $m = 2$  belong to noncentrosymmetric polar space which do not contain an inversion center.

| Chemical Formula                      | “A” site cation CN | $c$ (Å) | Space group | Polar or Nonpolar | $m$ |
|---------------------------------------|--------------------|---------|-------------|-------------------|-----|
| $\text{Cu}_2\text{Ta}_4\text{O}_{11}$ | 2                  | 0.0     | $R\bar{3}c$ | Nonpolar          | 1   |
| $\text{Ag}_2\text{Nb}_4\text{O}_{11}$ | 6                  | 37.0163 | $R\bar{3}c$ | Nonpolar          | 1   |
| $\text{Ag}_2\text{Ta}_4\text{O}_{11}$ | 6                  | 36.86   | $R\bar{3}c$ | Nonpolar          | 1   |
| $\text{Na}_2\text{Ta}_4\text{O}_{11}$ | 7                  | 36.56   | $R\bar{3}c$ | Nonpolar          | 1   |
| $\text{PbTa}_4\text{O}_{11}$          | 7                  | 36.8613 | $R3$        | Polar             | 2   |
| $\text{Na}_2\text{Nb}_4\text{O}_{11}$ | 7                  | 12.745  | $C2/c$      | Nonpolar          | 1   |
| $\text{CaTa}_4\text{O}_{11}$          | 8                  | 12.47   | $P6_322$    | Polar             | 2   |
| $\text{SrTa}_4\text{O}_{11}$          | 8                  | 12.33   | $P6_322$    | Polar             | 2   |

**Table S3.** A table of selected members comprised of single and double pentagonal bipyramid layers alternating with octahedral layers. The space group, unit cell parameters, and interatomic distances listed for symmetry unique MO<sub>7</sub> pentagonal bipyramids (M = Nb, Ta) are included.

| Layer                         | Chemical Formula                                 | Space Group                        | <i>a</i> (Å) | <i>b</i> (Å) | <i>c</i> (Å) | Interatomic distances (Å)                                                                                                                                                                                                        | Ref.    |
|-------------------------------|--------------------------------------------------|------------------------------------|--------------|--------------|--------------|----------------------------------------------------------------------------------------------------------------------------------------------------------------------------------------------------------------------------------|---------|
| Alternating single and double | Cu <sub>5</sub> Ta <sub>11</sub> O <sub>30</sub> | <i>P</i> $\bar{6}2c$               | 6.2297(2)    | 6.2297(2)    | 32.550(2)    | TaO <sub>7</sub> : Ta1-O 1.975(4) x2<br>Ta1-O 1.999(6) x2<br>Ta1-O 2.020 (2) x2<br>Ta1-O 2.422 (8)<br>Ta2-O 1.898(1)<br>Ta2-O 1.994(7)<br>Ta2-O 2.005(6)<br>Ta2-O 2.012(1)<br>Ta2-O 2.013(7)<br>Ta2-O 2.048(4)<br>Ta2-O 2.413(5) | [44,47] |
|                               | Cu <sub>7</sub> Ta <sub>15</sub> O <sub>41</sub> | <i>P</i> 6 <sub>3</sub> / <i>m</i> | 6.2262       | 6.2262       | 44.877       | N/A                                                                                                                                                                                                                              | [40]    |
|                               | Pr <sub>2</sub> Nb <sub>11</sub> O <sub>30</sub> | <i>P</i> $\bar{6}2c$               | 6.2325(5)    | 6.2325(5)    | 32.3677(36)  | NbO <sub>7</sub> : Nb1-O 1.947 x2<br>Nb1-O 1.967 x2<br>Nb1-O 2.060 x2<br>Nb1-O 2.488<br>Nb2-O 1.894<br>Nb2-O 1.995<br>Nb2-O 2.002<br>Nb2-O 2.005<br>Nb2-O 2.067<br>Nb2-O 2.084<br>Nb2-O 2.424                                    | [49]    |

**Table S4.** A table of selected members comprised of double pentagonal bipyramid layers alternating with octahedral layers. The space group, unit cell parameters, and interatomic distances listed for symmetry unique MO<sub>7</sub> pentagonal bipyramids (M= Nb, Ta) are included.

| Layer          | Chemical Formula                                | Space Group                          | <i>a</i> (Å) | <i>b</i> (Å) | <i>c</i> (Å) | Interatomic distances (Å)                                                                                                                | Ref.    |
|----------------|-------------------------------------------------|--------------------------------------|--------------|--------------|--------------|------------------------------------------------------------------------------------------------------------------------------------------|---------|
| n=2,<br>double | BiTa <sub>7</sub> O <sub>19</sub>               | <i>P</i> $\bar{6}$ <i>c</i> 2        | 6.2197(2)    | 6.2197(2)    | 20.02981(9)  | TaO <sub>7</sub> : Ta-O 1.9064(8)<br>Ta-O 1.977(3)<br>Ta-O 1.990(3)<br>Ta-O 2.002(1)<br>Ta-O 2.049(2)<br>Ta-O 2.024(1)<br>Ta-O 2.4415(9) | [35]    |
|                | Cu <sub>3</sub> Ta <sub>7</sub> O <sub>19</sub> | <i>P</i> 6 <sub>3</sub> / <i>m</i>   | 6.2278(1)    | 6.2278(1)    | 20.1467(3)   | TaO <sub>7</sub> : Ta-O 1.895(3)<br>Ta-O 1.979(6)<br>Ta-O 1.984(1)<br>Ta-O 2.016(2)<br>Ta-O 2.068(4)<br>Ta-O 2.071(3)<br>Ta-O 2.508(5)   | [47]    |
|                | CeTa <sub>7</sub> O <sub>19</sub>               | <i>P</i> $\bar{6}$ <i>c</i> 2        | 6.226(3)     | 6.226(3)     | 19.976(8)    | TaO <sub>7</sub> : Ta-O 1.886(6)<br>Ta-O 1.97(4)<br>Ta-O 1.981(6) x2<br>Ta-O 2.06(2) x2<br>Ta-O 2.48(3)                                  | [50,56] |
|                | EuTa <sub>7</sub> O <sub>19</sub>               | <i>P</i> 6 <sub>3</sub> / <i>mcm</i> | 6.217        | 6.217        | 19.9         | N/A                                                                                                                                      | [46]    |
|                | DyTa <sub>7</sub> O <sub>19</sub>               | <i>P</i> $\bar{6}$ <i>c</i> 2        | 6.199(3)     | 6.199(3)     | 19.859(6)    | TaO <sub>7</sub> : Ta-O 1.87(2)<br>Ta-O 1.891(3)<br>Ta-O 2.04(2)<br>Ta-O 2.011(3)<br>Ta-O 2.07(1)<br>Ta-O 2.09(2)<br>Ta-O 2.45(1)        | [51]    |
|                | LaTa <sub>7</sub> O <sub>19</sub>               | <i>P</i> $\bar{6}$ <i>c</i> 2        | 6.23(6)      | 6.23(6)      | 19.99(5)     | TaO <sub>7</sub> : Ta-O 1.896(1)<br>Ta-O 1.926(1)<br>Ta-O 1.940(1)<br>Ta-O 1.997(1)<br>Ta-O 2.046(1)<br>Ta-O 2.094(1)<br>Ta-O 2.463(1)   | [52]    |
|                | NdTa <sub>7</sub> O <sub>19</sub>               | <i>P</i> 6 <sub>3</sub> / <i>mcm</i> | 6.225(2)     | 6.225(2)     | 19.94(2)     | N/A                                                                                                                                      | [45,58] |
|                | YTa <sub>7</sub> O <sub>19</sub>                | Undetermined                         | 6.2035(2)    | 6.2035(2)    | 19.865(1)    | N/A                                                                                                                                      | [45,58] |

**Table S5.** A table of selected members comprised of single and triple pentagonal bipyramid layers alternating with octahedral layers. The space group, unit cell parameters, and interatomic distances listed for symmetry unique MO<sub>7</sub> pentagonal bipyramids (M= Nb, Ta) are included.

| Layer                           | Chemical Formula                  | Space Group | <i>a</i> (Å) | <i>b</i> (Å) | <i>c</i> (Å) | Interatomic distances (Å)                                                                                                                                                                                                                                                                                                                                                                                                               | Ref.    |
|---------------------------------|-----------------------------------|-------------|--------------|--------------|--------------|-----------------------------------------------------------------------------------------------------------------------------------------------------------------------------------------------------------------------------------------------------------------------------------------------------------------------------------------------------------------------------------------------------------------------------------------|---------|
| n=2,<br>single<br>and<br>triple | CeNb <sub>7</sub> O <sub>19</sub> | <i>P</i> 3  | 6.2481(3)    | 6.2481(3)    | 20.0566(11)  | N/A                                                                                                                                                                                                                                                                                                                                                                                                                                     | [56]    |
|                                 | LaNb <sub>7</sub> O <sub>19</sub> | <i>P</i> 3  | 6.2531(2)    | 6.2531(2)    | 20.0685(10)  | NbO <sub>7</sub> : Nb1-O 1.945<br>Nb1-O 1.954<br>Nb1-O 1.969<br>Nb1-O 1.974<br>Nb1-O 2.065<br>Nb1-O 2.068<br>Nb1-O 2.496<br>Nb2-O 1.837<br>Nb2-O 2.004<br>Nb2-O 2.007<br>Nb2-O 2.010<br>Nb2-O 2.075<br>Nb2-O 2.109<br>Nb2-O 2.436<br>Nb3-O 1.963<br>Nb3-O 1.968<br>Nb3-O 2.006 x2<br>Nb3-O 2.011<br>Nb3-O 2.022<br>Nb3-O 2.413<br>Nb4-O 1.842<br>Nb4-O 2.003<br>Nb4-O 2.006<br>Nb4-O 2.012<br>Nb4-O 2.071<br>Nb4-O 2.100<br>Nb4-O 2.440 | [57]    |
|                                 | NdNb <sub>7</sub> O <sub>19</sub> | <i>P</i> 3  | 6.2365(2)    | 6.2365(2)    | 20.0183(10)  | N/A                                                                                                                                                                                                                                                                                                                                                                                                                                     | [45,58] |
|                                 | PrNb <sub>7</sub> O <sub>19</sub> | <i>P</i> 3  | 6.2455(3)    | 6.2455(3)    | 20.5017(11)  | N/A                                                                                                                                                                                                                                                                                                                                                                                                                                     | [45,58] |
